# Supplementary material
Source: publisher site journal article supplement (https://www.dovepress.com/get_supplementary_file.php?f=293482.docx)
Supplement: Supplementary file 1 [file get_supplementary_file.php]

**Supplemental Material:**

**Table S1** Main effects of *Clock* gene and valproate on the behavior of *Clock*delta19 mice

|  | Gene | |  | Treatment | |  | Interaction | |  |
| --- | --- | --- | --- | --- | --- | --- | --- | --- | --- |
|  | F | p |  | F | p |  | F | p |  |
| Distance Moved | 22.63 | ***0.000*** |  | 5.08 | ***0.03*** |  | 0.99 | 0.33 |  |
| Time in open arm | 9.20 | ***0.005*** |  | 4.86 | ***0.034*** |  | 6.84 | ***0.013*** |  |
| Number of entries | 11.12 | ***0.002*** |  | 8.09 | ***0.007*** |  | 7.01 | ***0.012*** |  |
| Immobile Time | 7.42 | ***0.011*** |  | 6.38 | ***0.017*** |  | 5.67 | ***0.024*** |  |

**Table S2** The results of Fisher’s LSD test for post hoc analysis of behavioral tests

|  | WT | | |  | Clk | | |  | p values of multiple comparisons | | | | | | | | | | |
| --- | --- | --- | --- | --- | --- | --- | --- | --- | --- | --- | --- | --- | --- | --- | --- | --- | --- | --- | --- |
|  | Sal |  | VPA |  | Sal |  | VPA |  | WT Sal/  WT VPA |  | WT Sal/  Clk Sal |  | WT Sal /  Clk VPA |  | WT VPA  Clk Sal |  | WT VPA  Clk VPA |  | Clk Sal/  Clk VPA |
| Distance Moved | 2874 ± 229 |  | 2621 ± 214 |  | 4029 ± 148 |  | 3377 ± 202 |  | 0.38 |  | ***0.000*** |  | 0.09 |  | ***0.000*** |  | ***0.01*** |  | ***0.028*** |
| Time in open arms | 30.1 ± 7.3 |  | 34.60 ± 9.7 |  | 92.43 ± 18.0 |  | 39.2 ± 9.1 |  | 0.77 |  | ***0.000*** |  | 0.55 |  | ***0.001*** |  | 0.76 |  | ***0.002*** |
| Number of entries | 23.0 ± 2.9 |  | 22.2 ± 4.3 |  | 47.4 ± 5.0 |  | 25.0 ± 4.1 |  | 0.89 |  | ***0.000*** |  | 0.72 |  | ***0.000*** |  | 0.62 |  | ***0.001*** |
| Immobile Time | 244.6 ± 14.1 |  | 246.1 ± 11.6 |  | 192. 6 ± 4.7 |  | 242.5 ± 5.8 |  | 0.92 |  | ***0.001*** |  | 0.90 |  | ***0.001*** |  | 0.81 |  | ***0.002*** |

**Note:** Data are presented as the mean ± standard error of the mean (SEM)

**Abbreviations:** WT, wildtype mice; Clk , *Clock*delta19 mice; Sal, saline; VPA, valproate;

**Table S3** Main effects of *Clock* gene and valproate on themonoamines and their metabolites in the hippocampus of *Clock*delta19 mice

|  |  |  | Main effect | | | | |  | Interaction | |
| --- | --- | --- | --- | --- | --- | --- | --- | --- | --- | --- |
|  |  |  | Gene | |  | Treatment | |  |  | |
|  |  |  | F | p |  | F | p |  | F | p |
|  | 5-HT |  | 2.38 | 0.13 |  | 0.02 | 0.89 |  | 0.33 | 0.57 |
| Left | L-5-HLP |  | 0.14 | 0.71 |  | 2.19 | 0.15 |  | 2.69 | 0.11 |
| DA |  | 3.15 | 0.09 |  | 4.68 | 0.04 |  | 0.05 | 0.82 |
|  | L-DOPA |  | 1.50 | 0.23 |  | 0.51 | 0.48 |  | 1.46 | 0.24 |
|  | 5-HT |  | 13.02 | **0.001** |  | 2.60 | 0.12 |  | 0.02 | 0.90 |
| Right | L-5-HLP |  | 0.06 | 0.80 |  | 0.14 | 0.71 |  | 5.35 | 0.03 |
| DA |  | 13.35 | ***0.001*** |  | 0.05 | 0.83 |  | 0.21 | 0.65 |
|  | L-DOPA |  | 0.24 | 0.63 |  | 10.32 | ***0.003*** |  | 1.61 | 0.22 |

**Note:** The adjusted p value at 0.05 level is 0.0125

**Table S4** The results of Fisher’s LSD test for post hoc analysis of monoamines and their metabolites in the hippocampus of *Clock*delta19 mice

|  |  |  |  | WT | | | | | |  | | Clk | | | |  | | p values of multiple comparisons | | | | | | | | | | | | | | | | | | |
| --- | --- | --- | --- | --- | --- | --- | --- | --- | --- | --- | --- | --- | --- | --- | --- | --- | --- | --- | --- | --- | --- | --- | --- | --- | --- | --- | --- | --- | --- | --- | --- | --- | --- | --- | --- | --- |
|  |  |  |  | Sal |  | | VPA |  | | | | Sal |  | | VPA |  | | WT Sal /  WT VPA | | |  | | WT Sal/  Clk Sal | |  | | WT Sal/  Clk VPA | |  | | WT VPA/  Clk Sal | |  | WT VPA/  Clk VPA |  | Clk Sal /  Clk VPA |
|  |  | 5-HT |  | 0.44 ± 0.03 |  | 0.41 ± 0.04 | | |  | | 0.35 ± 0.06 | |  | 0.37 ± 0.04 | | |  | | - |  | | - | |  | | - | |  | | - | |  | - | |  | - |
| L |  | L-5-HLP |  | 0.03 ± 0.01 |  | 0.03 ± 0.01 | | |  | | 0.04 ± 0.01 | |  | 0.02 ± 0.00 | | |  | | - |  | | - | |  | | - | |  | | - | |  | - | |  | - |
|  | DA |  | 0.58 ± 0.03 |  | 0.51 ± 0.03 | | |  | | 0.53 ± 0.03 | |  | 0.45 ± 0.03 | | |  | | - |  | | - | |  | | - | |  | | - | |  | - | |  | - |
|  |  | DOPA |  | 3.12 ± 0.36 |  | 3.28 ± 0.96 | | |  | | 3.12 ± 0.26 | |  | 2.51 ± 0.29 | | |  | | - |  | | - | |  | | - | |  | | - | |  | - | |  | - |
|  |  | 5-HT |  | 0.41 ± 0.03 |  | 0.36 ± 0.03 | | |  | | 0.30 ± 0.02 | |  | 0.26 ± 0.03 | | |  | | 0.23 |  | | ***0.013*** | |  | | ***0.001*** | |  | | 0.17 | |  | ***0.02*** | |  | 0.30 |
| R |  | L-5-HLP |  | 0.04 ± 0.01 |  | 0.02 ± 0.00 | | |  | | 0.02 ± 0.01 | |  | 0.04 ± 0.01 | | |  | | - |  | | - | |  | | - | |  | | - | |  | - | |  | - |
|  | DA |  | 0.61 ± 0.07 |  | 0.64 ± 0.09 | | |  | | 0.43 ± 0.03 | |  | 0.42 ± 0.03 | | |  | | 0.66 |  | | ***0.023*** | |  | | ***0.015*** | |  | | ***0.016*** | |  | ***0.011*** | |  | 0.86 |
|  |  | DOPA |  | 2.53 ± 0.36 |  | 1.89 ± 0.23 | | |  | | 3.10 ± 0.41 | |  | 1.64 ± 0.27 | | |  | | 0.18 |  | | 0.22 | |  | | 0.07 | |  | | ***0.014*** | |  | 0.59 | |  | ***0.004*** |

**Note:** Data are presented as the mean ± standard error of the mean (SEM)

**Abbreviations:** L, left hippocampus; R, right hippocampus; 5-HT, serotonin; L-5-HTP, 5-hydroxy-L-tryptophan; DA, dopamine; L-DOPA, levodopa; WT, wildtype mice; Clk, *Clock*delta19 mice; Sal, saline; VPA, valproate;
